# Supplementary material for: Tuned synthesis and characterizational insight into β-cyclodextrin amended hydrous iron-zirconium hybrid oxide: a promising scavenger of fluoride in aqueous solution
Source: Royal Society of Chemistry journal article supplement (doi:10.1039/c6ra16567b), 2016-01-01
Supplement: c6ra16567b1.pdf [file c6ra16567b1.pdf]

**Tuned synthesis and characterizational insight into  $\beta$ -cyclodextrin amended hydrous iron-zirconium hybrid oxide: a promising scavenger of fluoride in aqueous solution**

Indranil Saha<sup>1,2</sup>, Sarat Kanrar<sup>1</sup>, Kaushik Gupta<sup>1</sup>, Bibhutibhushan Show<sup>3</sup>, Debabrata Nandi<sup>4</sup>, Krishna Biswas<sup>5</sup>, Biswaranjan Manna<sup>1</sup>, Debashis Chatterjee<sup>6</sup>, Uday Chand Ghosh<sup>1\*</sup>

<sup>1</sup>Department of Chemistry, Presidency University, 86/1 College Street, Kolkata-700073, India

<sup>2</sup>Department of Chemistry, Sripat Singh College, Jiaganj, Murshidabad-742123, India

<sup>3</sup>Department of Chemistry, Jadavpur University, Kolkata-700032, India

<sup>4</sup>Department of Civil and Chemical Engineering, University of South Africa (UNISA), South Africa

<sup>5</sup>Department of Chemistry, Maharaja Manindra Chandra College, Kolkata-700003, India

<sup>6</sup>Department of Chemistry (Analytical), University of Kalyani, Nadia-741235, India

\*Corresponding author, Telephone/Fax: +91-33-2241 3893

E-mail: [ucghosh@yahoo.co.in](mailto:ucghosh@yahoo.co.in)

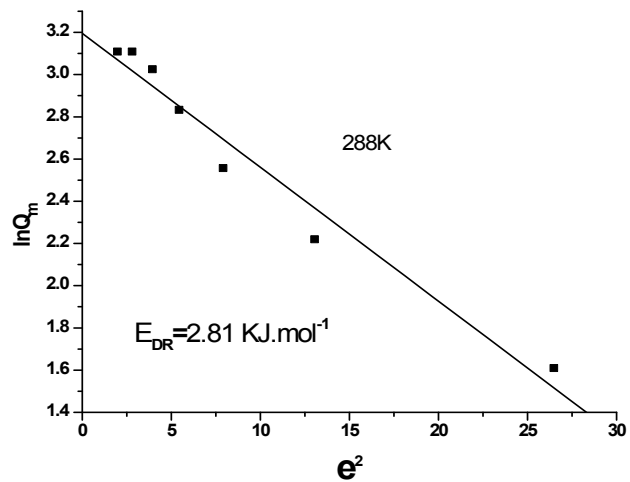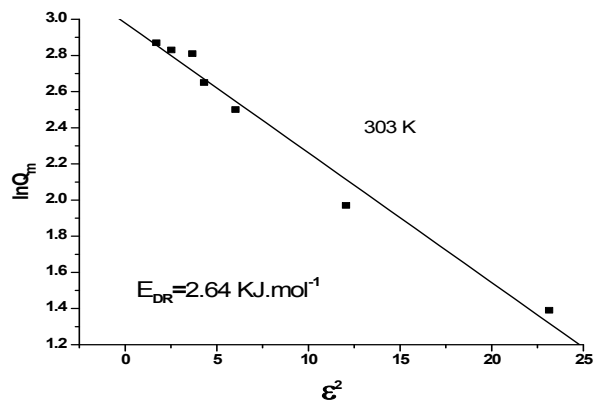

Fig.S1: D-R Isotherm plots of fluoride adsorption reaction with CHIZO at 288 and 303K

Table S1: Dubinin-Raduskevich isotherm parameters on fluoride adsorption by CHIZO

| Temperature (K) | $Q_m$ (mol.Kg <sup>-1</sup> ) | B (mol <sup>2</sup> .kJ <sup>-2</sup> ) | $E_{DR}$ (kJ.mol <sup>-1</sup> ) |
|-----------------|-------------------------------|-----------------------------------------|----------------------------------|
| 288             | 24.42                         | 0.06341                                 | 2.81                             |
| 308             | 19.68                         | 0.07177                                 | 2.64                             |
